# Supplementary material for: Hyperprogressive Disease Is a New Pattern of Progression in Cancer Patients Treated by Anti-PD-1/PD-L1
Source: Oxford University Press journal article supplement (doi:10.1158/1078-0432.ccr-16-1741), 2016-11-09
Supplement: 10780432ccr161741-sup-168835_1_supp_3679279_ndz8cr.xlsx [file 10780432ccr161741-sup-168835_1_supp_3679279_ndz8cr.xlsx]

## Sheet: Feuil1
Table S1	Overall survival estimates (landmark survival analysis)
			Overall Survival	P value
			median in months
			(95% CI)
	HPD-adapted RECIST classes*	CR-PR (N=16)	NA (NA-NA)	< 1e-5
		SD (N=64)	29.3 (19.1-NA)
		PD (N=36)	7.6 (5.9-16.0)
		HPD (N=10)	4.6 (2.0-NA)
	*HPD adapted RECIST classes: complete response (CR), partial response (PR) and stable disease (SD) remained as defined by RECIST 1.1.
	Regarding progressive disease patients, these were allocated to PD non-HPD and to HPD.
	HPD patients are defined as progressive disease (PD) by RECIST 1.1 at the first evaluation
	and an increase ≥ two-fold in the TGR EXPERIMENTAL compared to REFERENCE period.
