# Supplementary material for: Hyperprogressive Disease Is a New Pattern of Progression in Cancer Patients Treated by Anti-PD-1/PD-L1
Source: Oxford University Press journal article supplement (doi:10.1158/1078-0432.ccr-16-1741), 2016-11-09
Supplement: 10780432ccr161741-sup-168835_1_supp_3679280_ddz8cr.xlsx [file 10780432ccr161741-sup-168835_1_supp_3679280_ddz8cr.xlsx]

## Sheet: Feuil1
Table S2	Multivariate Cox regression analysis of the overall survival according to RMH prognostic score and HPD adapted RECIST classes (landmark analysis).
			Overall Survival
			Hazard ratio (95% CI)	P value
	HPD-adapted RECIST classes*	SD vs. CR-PR	4.9 (1.16-20.97)	0.03
		PD vs. CR-PR	16.5 (3.91-69.84)	1 e-4
		HPD vs. CR-PR	25.9 (5.57-120.74)	3 e-5
	RMH prognostic score	High (2-3) vs Low (0-1)	1.6 (0.99-2.62)	0.06
	*HPD adapted RECIST classes: complete response (CR), partial response (PR) and stable disease (SD) remained as defined by RECIST 1.1.
	Regarding progressive disease patients, these were allocated to PD non-HPD and to HPD.
	HPD patients are defined as progressive disease (PD) by RECIST 1.1 at the first evaluation
	and an increase ≥ two-fold in the TGR EXPERIMENTAL compared to REFERENCE period.
