# Supplementary material for: Hyperprogressive Disease Is a New Pattern of Progression in Cancer Patients Treated by Anti-PD-1/PD-L1
Source: Oxford University Press journal article supplement (doi:10.1158/1078-0432.ccr-16-1741), 2016-11-09
Supplement: 10780432ccr161741-sup-168835_1_supp_3679287_rdz8dv.xlsx [file 10780432ccr161741-sup-168835_1_supp_3679287_rdz8dv.xlsx]

## Sheet: Feuil1
Table S3	Multivariate linear regression model evaluating the association between tumor response (RECIST, %) and the following variables : age > 65 y.o. (yes/no), TGR REFERENCE and the Royal Marsden Prognostic score High (2-3) vs Low (1-2)
		Regression coefficients	P value
	Intercept	0.04	0.29
	Age >65	0.16	0.037
	TGR REFERENCE*	-2.5e-4	8 e-4
	RMH prognostic score (2-3) vs (0-1)	0.11	0.10
	* To be clinically meaningful, estimates are computed for 10% variation in TGR
